# Supplementary figures and images for: p-Hydroquinone–metal compounds: synthesis and crystal structure of two novel VV–p-hydroquinonate and VIV–p-semiquinonate species
Source: Royal Society of Chemistry journal article supplement (doi:10.1039/b207330g), 2002-01-01

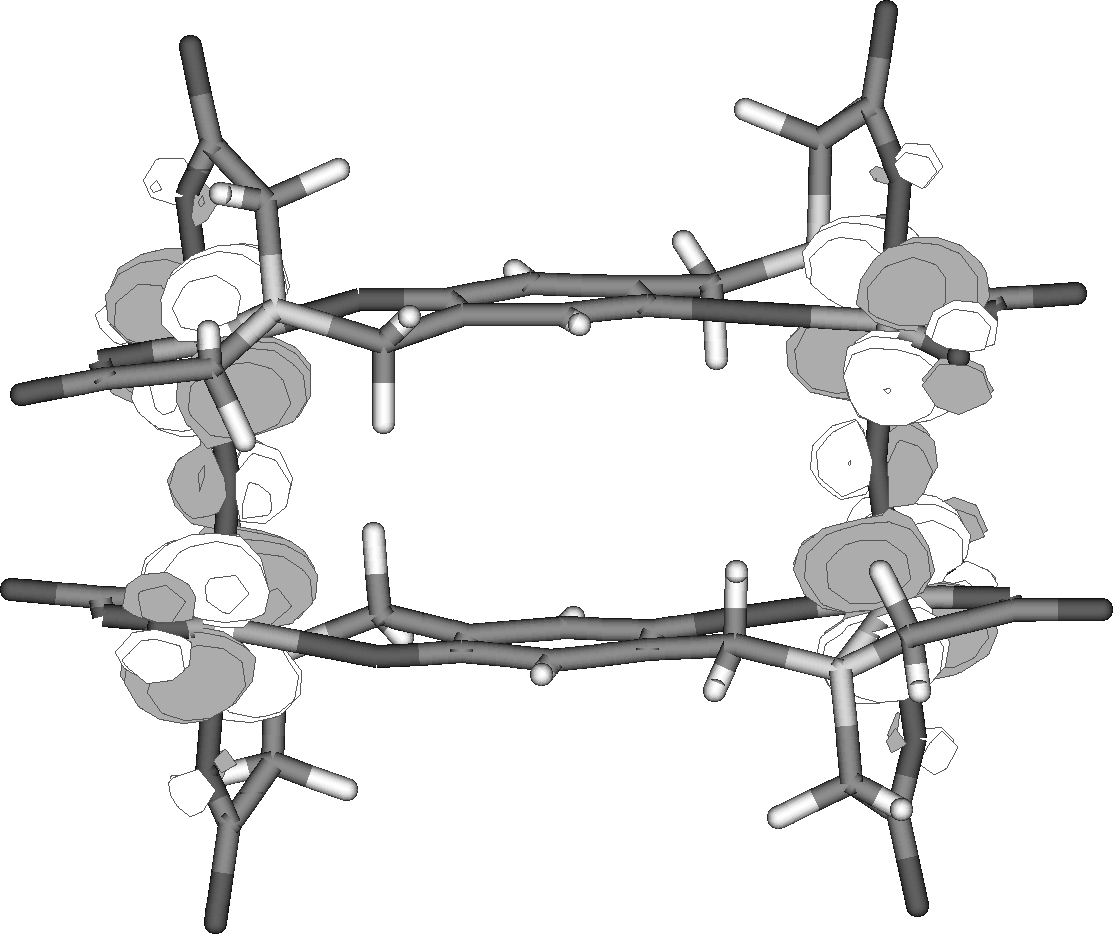

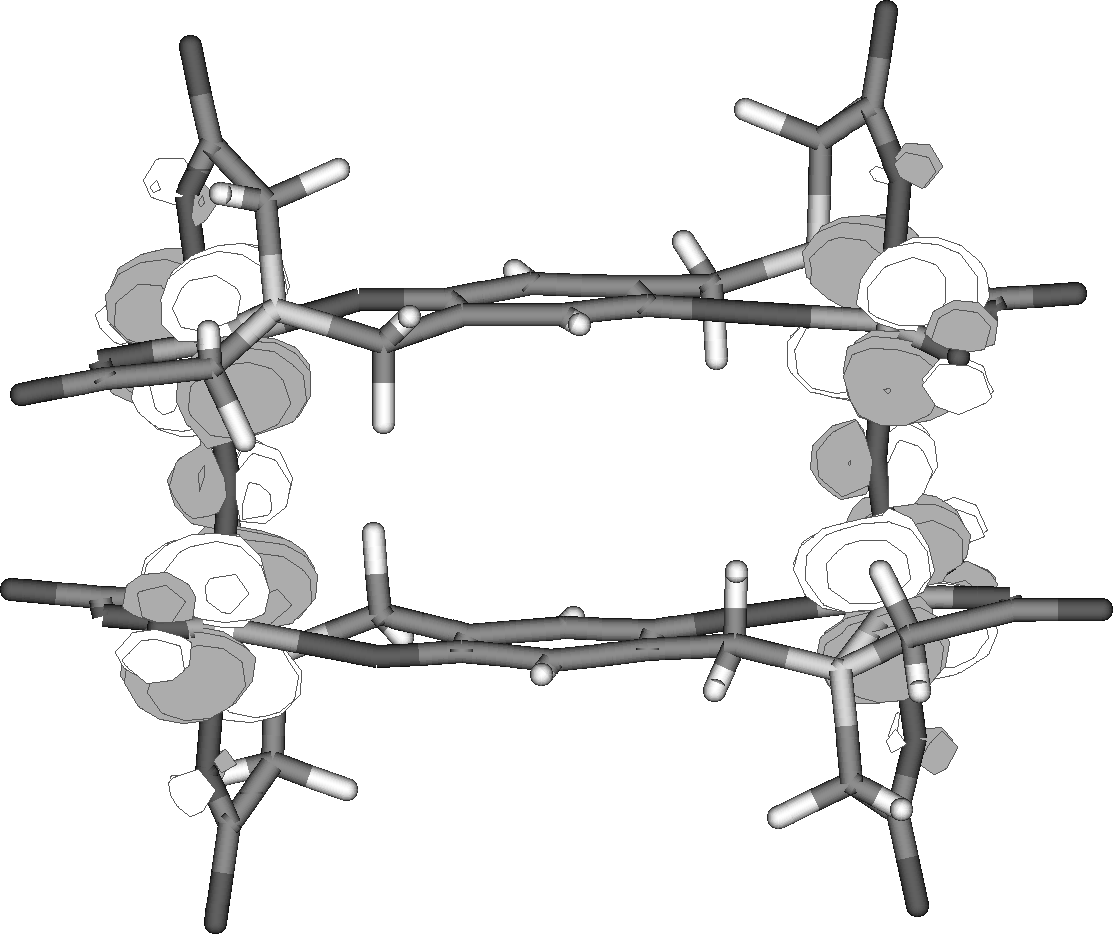


**SOMO1 (A1) SOMO2 (B2)**


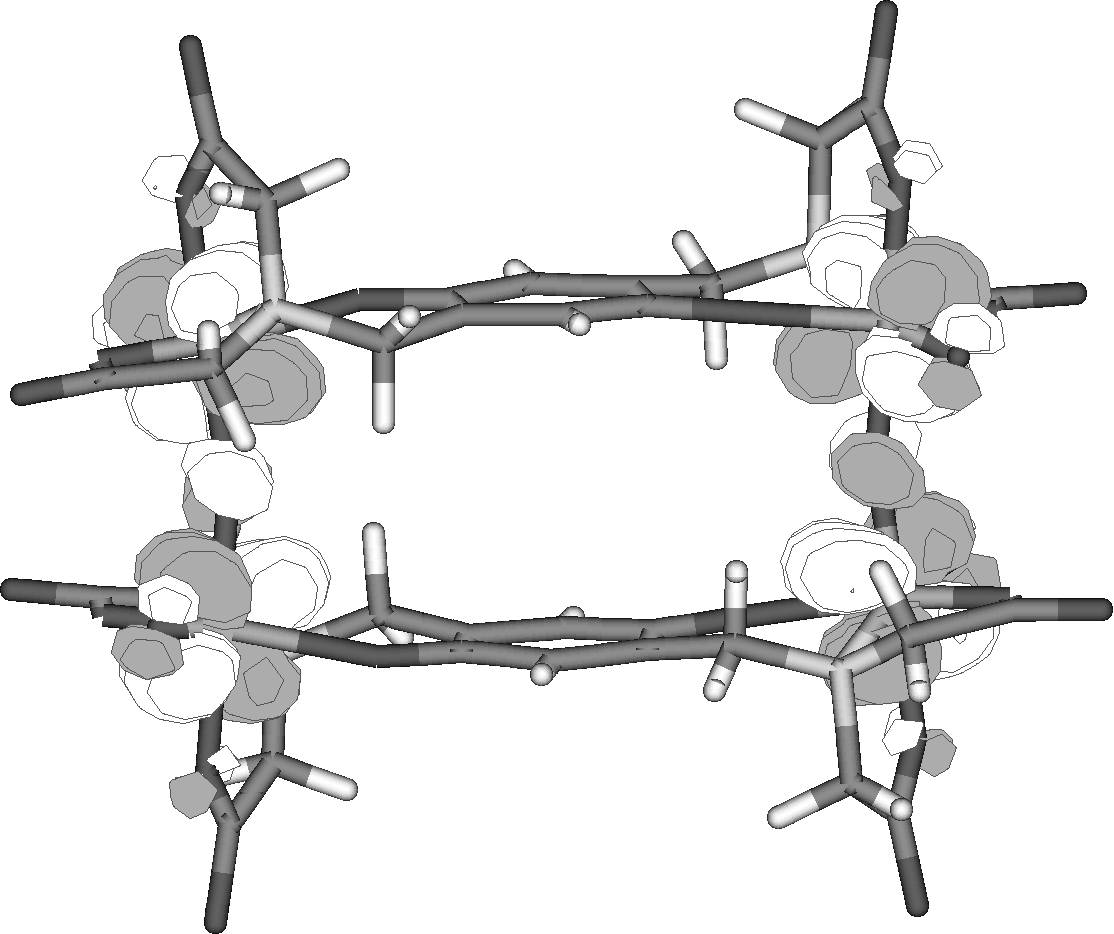

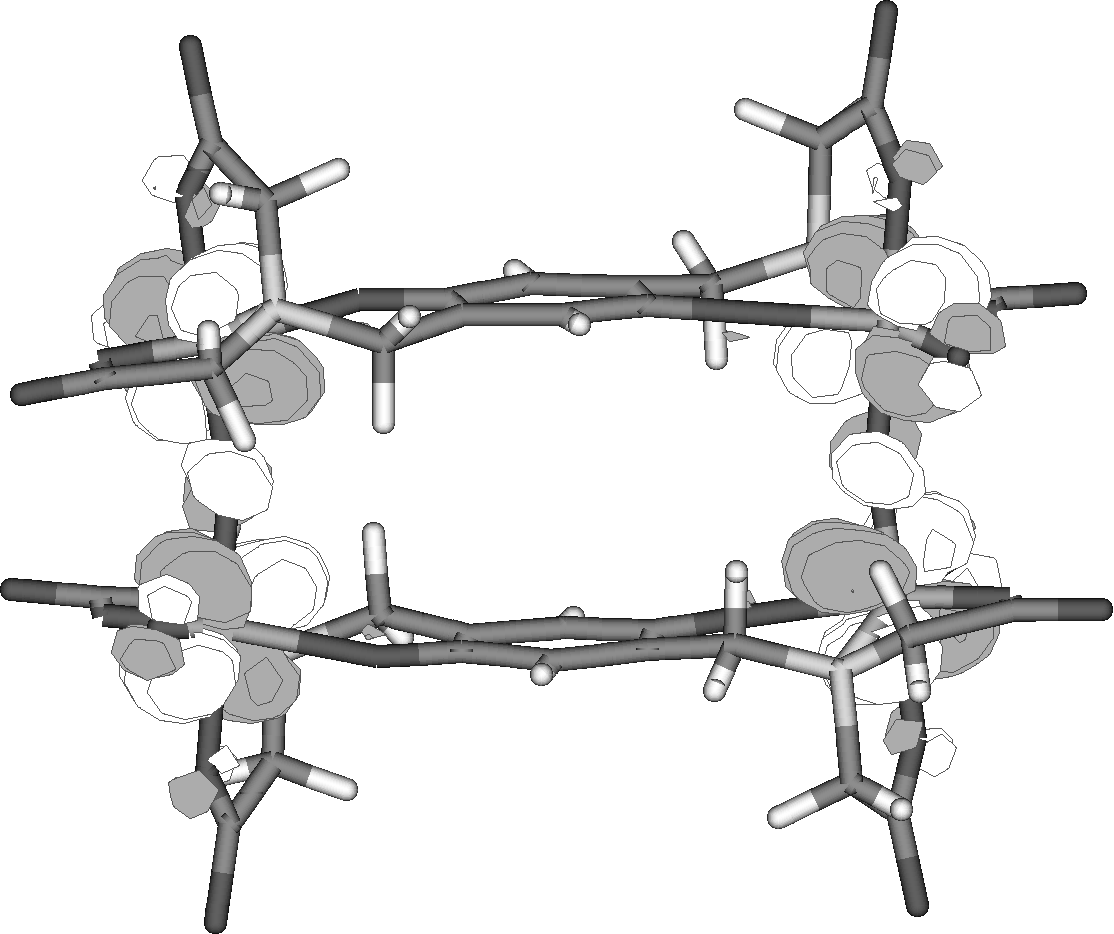


**SOMO3 (B3) SOMO4 (B1)**

**Figure S1**

Supplement: b207330g.doc [file b207330g.doc]
